# Supplementary material for: Health Disparities and Diversity Research Presented at the American Association of Hip and Knee Surgeons 2021 Annual Meeting
Source: PubMed Central journal article supplement — Arthroplast Today. 2022 Mar 21;15:6–8. doi: 10.1016/j.artd.2022.02.020 (PMC8943335; doi:10.1016/j.artd.2022.02.020), 2022-03-21
Supplement: mmc1.pdf [file mmc1.pdf]

# CONFLICT OF INTEREST STATEMENT

## *American Association of Hip and Knee Surgeons*

(Adopted from the American Academy of Orthopaedic Surgeons disclosure statement)

The following form **must be filled out completely and submitted by each author (example, 6 authors, 6 forms).**  
**All items require a response. If there is no relevant disclosure for a given item, enter "None."**

Health Disparities and Diversity Research Presented at the American Association of Hip and Knee Surgeons 2021 Annual Meeting

---

Manuscript Title

1. Royalties from a company or supplier (The following conflicts were disclosed)

None

2. Speakers bureau/paid presentations for a company or supplier (The following conflicts were disclosed)

none

3A. Paid employee for a company or supplier (The following conflicts were disclosed)

none

3B. Paid consultant for a company or supplier (The following conflicts were disclosed)

none

3C. Unpaid consultants for a company or supplier (The following conflicts were disclosed)

none

4. Stock or stock options in a company or supplier (The following conflicts were disclosed)

none

5. Research support from a company or supplier as a Principal Investigator (The following conflicts were disclosed)

none

6. Other financial or material support from a company or supplier (The following conflicts were disclosed)

none

7. Royalties, financial or material support from publishers (The following conflicts were disclosed)

JBJS

8. Medical/Orthopaedic publications editorial/governing board (The following conflicts were disclosed)

Arthroplasty Today

Journal of Arthroplasty

9. Board member/committee appointments for a society (The following conflicts were disclosed)

AAHKS nominating committee

AAHKS young arthroplasty group

RJOS education committee

**Each author must sign AND print or type his/her name, date and submit a separate form**

In addition, one BLINDED Conflict of Interest form (no author names used) should be submitted per manuscript with all author disclosures.

Anna Cohen-Rosenblum



12/8/21

---

Author Name (Print or Type)

Author Signature

Date
